# Supplementary material for: Differentially Expressed Genes and Pathways between Reversible and Irreversible Pulmonary Arterial Hypertension Associated with Congenital Heart Disease Investigated by Bioinformatics Analysis in Rat Model
Source: Research Square preprint supplement (doi:10.21203/rs.3.rs-3245324/v1), 2023-09-05
Supplement: Supplementary file 1 [file d7e9902c730d824304da5520.docx]

**Supplementary Table 1 GSEA between the control group and the reversible PAH-CHD**

| ID | Description | setSize | Enrichment Score | NES | p.adjust | qvalue |
| --- | --- | --- | --- | --- | --- | --- |
| rno04110 | Cell cycle | 151 | 0.736842 | 2.628831 | 1.68E-08 | 1.26E-08 |
| rno05322 | Systemic lupus erythematosus | 94 | 0.695302 | 2.325789 | 1.68E-08 | 1.26E-08 |
| rno04115 | p53 signaling pathway | 66 | 0.68027 | 2.145301 | 8.71E-06 | 6.57E-06 |
| rno03030 | DNA replication | 34 | 0.738172 | 2.066094 | 0.000177 | 0.000133 |
| rno03460 | Fanconi anemia pathway | 47 | 0.689037 | 2.051686 | 0.000104 | 7.87E-05 |
| rno05222 | Small cell lung cancer | 87 | 0.618468 | 2.042369 | 3.53E-05 | 2.66E-05 |
| rno04933 | AGE-RAGE signaling pathway in diabetic complications | 99 | 0.597541 | 2.020814 | 3.53E-05 | 2.66E-05 |
| rno03440 | Homologous recombination | 40 | 0.693036 | 1.994483 | 0.000356 | 0.000268 |
| rno05203 | Viral carcinogenesis | 194 | 0.535194 | 1.961904 | 2.77E-06 | 2.09E-06 |
| rno04114 | Oocyte meiosis | 115 | 0.566447 | 1.94489 | 0.000104 | 7.87E-05 |
| rno04914 | Progesterone-mediated oocyte maturation | 90 | 0.582933 | 1.932786 | 0.00019 | 0.000143 |
| rno05219 | Bladder cancer | 39 | 0.665317 | 1.904511 | 0.001788 | 0.001349 |
| rno04668 | TNF signaling pathway | 113 | 0.551658 | 1.891359 | 0.000119 | 8.95E-05 |
| rno04218 | Cellular senescence | 161 | 0.523176 | 1.87979 | 0.000103 | 7.76E-05 |
| rno05034 | Alcoholism | 148 | 0.525336 | 1.869586 | 0.000114 | 8.57E-05 |
| rno05212 | Pancreatic cancer | 74 | 0.575314 | 1.848892 | 0.001447 | 0.001091 |
| rno05161 | Hepatitis B | 148 | 0.517353 | 1.841176 | 0.000197 | 0.000149 |
| rno05206 | MicroRNAs in cancer | 155 | 0.514961 | 1.836509 | 0.000104 | 7.88E-05 |
| rno05166 | Human T-cell leukemia virus 1 infection | 227 | 0.486407 | 1.81744 | 6.10E-05 | 4.60E-05 |
| rno04814 | Motor proteins | 174 | 0.49981 | 1.810916 | 0.000103 | 7.76E-05 |
| rno03430 | Mismatch repair | 22 | 0.68639 | 1.784616 | 0.021914 | 0.016526 |
| rno05163 | Human cytomegalovirus infection | 224 | 0.479576 | 1.78233 | 0.000103 | 7.76E-05 |
| rno04145 | Phagosome | 161 | 0.491829 | 1.767158 | 0.000644 | 0.000486 |
| rno01524 | Platinum drug resistance | 75 | 0.546991 | 1.760786 | 0.002857 | 0.002154 |
| rno04613 | Neutrophil extracellular trap formation | 150 | 0.488082 | 1.737225 | 0.001383 | 0.001043 |
| rno05220 | Chronic myeloid leukemia | 75 | 0.53445 | 1.720418 | 0.004982 | 0.003757 |
| rno04926 | Relaxin signaling pathway | 124 | 0.494602 | 1.716766 | 0.00305 | 0.0023 |
| rno04510 | Focal adhesion | 193 | 0.468219 | 1.716326 | 0.000438 | 0.00033 |
| rno04657 | IL-17 signaling pathway | 90 | 0.517475 | 1.715753 | 0.006112 | 0.004609 |
| rno04620 | Toll-like receptor signaling pathway | 90 | 0.517428 | 1.715597 | 0.006112 | 0.004609 |
| rno05210 | Colorectal cancer | 84 | 0.521619 | 1.715234 | 0.0057 | 0.004299 |
| rno04610 | Complement and coagulation cascades | 84 | 0.520626 | 1.711966 | 0.005767 | 0.004349 |
| rno04512 | ECM-receptor interaction | 81 | 0.521767 | 1.706078 | 0.005952 | 0.004489 |
| rno05167 | Kaposi sarcoma-associated herpesvirus infection | 190 | 0.464379 | 1.704039 | 0.000469 | 0.000353 |
| rno05146 | Amoebiasis | 91 | 0.508578 | 1.693635 | 0.005767 | 0.004349 |
| rno05215 | Prostate cancer | 95 | 0.501941 | 1.6833 | 0.006692 | 0.005047 |
| rno05165 | Human papillomavirus infection | 325 | 0.433589 | 1.671968 | 0.000114 | 8.57E-05 |
| rno05133 | Pertussis | 69 | 0.525854 | 1.667793 | 0.01358 | 0.010241 |
| rno05169 | Epstein-Barr virus infection | 205 | 0.449937 | 1.660052 | 0.001182 | 0.000891 |
| rno00670 | One carbon pool by folate | 18 | 0.668528 | 1.658941 | 0.070094 | 0.052859 |
| rno04062 | Chemokine signaling pathway | 177 | 0.446938 | 1.621002 | 0.004994 | 0.003766 |
| rno05142 | Chagas disease | 100 | 0.478367 | 1.611445 | 0.021914 | 0.016526 |
| rno05218 | Melanoma | 71 | 0.502874 | 1.604935 | 0.024346 | 0.01836 |
| rno05164 | Influenza A | 159 | 0.446341 | 1.598995 | 0.005442 | 0.004104 |
| rno01523 | Antifolate resistance | 29 | 0.581212 | 1.586174 | 0.088857 | 0.067009 |
| rno01522 | Endocrine resistance | 92 | 0.474359 | 1.575573 | 0.021914 | 0.016526 |
| rno04061 | Viral protein interaction with cytokine and cytokine receptor | 83 | 0.471761 | 1.549637 | 0.032523 | 0.024527 |
| rno04210 | Apoptosis | 127 | 0.44405 | 1.548288 | 0.020005 | 0.015086 |
| rno04540 | Gap junction | 85 | 0.469735 | 1.547791 | 0.027783 | 0.020952 |
| rno05162 | Measles | 132 | 0.43805 | 1.536327 | 0.021914 | 0.016526 |
| rno04380 | Osteoclast differentiation | 117 | 0.444674 | 1.531966 | 0.021914 | 0.016526 |
| rno04151 | PI3K-Akt signaling pathway | 337 | 0.396645 | 1.531871 | 0.00305 | 0.0023 |
| rno05152 | Tuberculosis | 167 | 0.424833 | 1.529237 | 0.024485 | 0.018465 |
| rno05418 | Fluid shear stress and atherosclerosis | 139 | 0.430769 | 1.516399 | 0.025795 | 0.019452 |
| rno01232 | Nucleotide metabolism | 80 | 0.4623 | 1.506727 | 0.06195 | 0.046718 |
| rno05134 | Legionellosis | 51 | 0.496979 | 1.502926 | 0.093383 | 0.070422 |
| rno04974 | Protein digestion and absorption | 101 | 0.443246 | 1.496452 | 0.0548 | 0.041326 |
| rno04068 | FoxO signaling pathway | 123 | 0.430349 | 1.490314 | 0.037097 | 0.027976 |
| rno03410 | Base excision repair | 44 | 0.508267 | 1.488128 | 0.117015 | 0.088244 |
| rno03013 | Nucleocytoplasmic transport | 107 | 0.433705 | 1.47612 | 0.057733 | 0.043538 |
| rno04066 | HIF-1 signaling pathway | 107 | 0.433351 | 1.474916 | 0.057733 | 0.043538 |
| rno05170 | Human immunodeficiency virus 1 infection | 204 | 0.39919 | 1.474483 | 0.021914 | 0.016526 |
| rno05211 | Renal cell carcinoma | 66 | 0.464191 | 1.463874 | 0.086311 | 0.065089 |
| rno04216 | Ferroptosis | 39 | 0.504519 | 1.444217 | 0.155225 | 0.117059 |
| rno04012 | ErbB signaling pathway | 81 | 0.441675 | 1.444194 | 0.072797 | 0.054898 |
| rno05323 | Rheumatoid arthritis | 86 | 0.433099 | 1.429435 | 0.085298 | 0.064325 |
| rno05213 | Endometrial cancer | 56 | 0.460356 | 1.411644 | 0.169433 | 0.127773 |
| rno05160 | Hepatitis C | 150 | 0.393811 | 1.401688 | 0.088701 | 0.066892 |
| rno01521 | EGFR tyrosine kinase inhibitor resistance | 78 | 0.432826 | 1.400071 | 0.169433 | 0.127773 |
| rno05150 | Staphylococcus aureus infection | 90 | 0.41794 | 1.385733 | 0.163409 | 0.123231 |
| rno05171 | Coronavirus disease - COVID-19 | 244 | 0.363916 | 1.368882 | 0.051077 | 0.038518 |
| rno05205 | Proteoglycans in cancer | 197 | 0.371796 | 1.36787 | 0.099581 | 0.075096 |
| rno04713 | Circadian entrainment | 92 | 0.409765 | 1.361026 | 0.169433 | 0.127773 |
| rno05132 | Salmonella infection | 239 | 0.362303 | 1.356282 | 0.053998 | 0.040721 |
| rno05417 | Lipid and atherosclerosis | 195 | 0.367644 | 1.351072 | 0.148394 | 0.111908 |
| rno05226 | Gastric cancer | 141 | 0.381191 | 1.34897 | 0.141022 | 0.106348 |
| rno04142 | Lysosome | 129 | 0.383202 | 1.337853 | 0.169433 | 0.127773 |
| rno04141 | Protein processing in endoplasmic reticulum | 161 | 0.370798 | 1.33229 | 0.169433 | 0.127773 |
| rno05020 | Prion disease | 247 | 0.349477 | 1.316013 | 0.093383 | 0.070422 |
| rno04810 | Regulation of actin cytoskeleton | 221 | 0.354209 | 1.314776 | 0.14557 | 0.109778 |
| rno04060 | Cytokine-cytokine receptor interaction | 265 | -0.29125 | -1.21679 | 0.162553 | 0.122585 |
| rno04650 | Natural killer cell mediated cytotoxicity | 94 | -0.35868 | -1.31389 | 0.168571 | 0.127123 |
| rno04640 | Hematopoietic cell lineage | 87 | -0.38347 | -1.3809 | 0.091408 | 0.068933 |
| rno04721 | Synaptic vesicle cycle | 77 | -0.4062 | -1.44283 | 0.057733 | 0.043538 |
| rno00982 | Drug metabolism - cytochrome P450 | 53 | -0.45426 | -1.50412 | 0.083007 | 0.062598 |
| rno00430 | Taurine and hypotaurine metabolism | 19 | -0.5899 | -1.52759 | 0.093383 | 0.070422 |
| rno00140 | Steroid hormone biosynthesis | 66 | -0.44961 | -1.54016 | 0.035425 | 0.026715 |
| rno04975 | Fat digestion and absorption | 43 | -0.49212 | -1.57441 | 0.056309 | 0.042464 |
| rno00591 | Linoleic acid metabolism | 36 | -0.53064 | -1.63539 | 0.038259 | 0.028852 |
| rno00360 | Phenylalanine metabolism | 17 | -0.66442 | -1.67303 | 0.058571 | 0.04417 |
| rno00830 | Retinol metabolism | 65 | -0.49061 | -1.67399 | 0.014542 | 0.010967 |
| rno04260 | Cardiac muscle contraction | 81 | -0.47199 | -1.68198 | 0.004994 | 0.003766 |
| rno05340 | Primary immunodeficiency | 35 | -0.5554 | -1.68958 | 0.021914 | 0.016526 |
| rno00350 | Tyrosine metabolism | 33 | -0.56777 | -1.7036 | 0.021914 | 0.016526 |
| rno00590 | Arachidonic acid metabolism | 75 | -0.5296 | -1.87042 | 0.000644 | 0.000486 |

**Supplementary Table 2 GSEA between the control group and the irreversible PAH-CHD**

| ID | Description | setSize | Enrichment Score | NES | p.adjust | qvalue |
| --- | --- | --- | --- | --- | --- | --- |
| rno05150 | Staphylococcus aureus infection | 90 | 0.672374 | 2.29707 | 7.10E-08 | 5.33E-08 |
| rno04610 | Complement and coagulation cascades | 84 | 0.675504 | 2.262329 | 9.44E-08 | 7.09E-08 |
| rno04614 | Renin-angiotensin system | 29 | 0.712912 | 1.971901 | 0.001691 | 0.00127 |
| rno04061 | Viral protein interaction with cytokine and cytokine receptor | 83 | 0.58653 | 1.959871 | 0.000317 | 0.000238 |
| rno05323 | Rheumatoid arthritis | 86 | 0.575258 | 1.948034 | 0.000317 | 0.000238 |
| rno04142 | Lysosome | 129 | 0.530169 | 1.894982 | 0.000317 | 0.000238 |
| rno04115 | p53 signaling pathway | 66 | 0.583856 | 1.893089 | 0.001181 | 0.000887 |
| rno05322 | Systemic lupus erythematosus | 94 | 0.546437 | 1.867477 | 0.000612 | 0.00046 |
| rno04145 | Phagosome | 161 | 0.489795 | 1.800861 | 0.000317 | 0.000238 |
| rno04110 | Cell cycle | 151 | 0.491218 | 1.799001 | 0.000634 | 0.000476 |
| rno04974 | Protein digestion and absorption | 101 | 0.518153 | 1.793966 | 0.001181 | 0.000887 |
| rno05310 | Asthma | 26 | 0.653385 | 1.766823 | 0.028102 | 0.021104 |
| rno05144 | Malaria | 49 | 0.576712 | 1.762875 | 0.007634 | 0.005733 |
| rno00330 | Arginine and proline metabolism | 51 | 0.574726 | 1.761458 | 0.00988 | 0.00742 |
| rno00790 | Folate biosynthesis | 28 | 0.637085 | 1.750802 | 0.028102 | 0.021104 |
| rno03030 | DNA replication | 34 | 0.592323 | 1.691241 | 0.032535 | 0.024433 |
| rno04216 | Ferroptosis | 39 | 0.57526 | 1.680571 | 0.029897 | 0.022452 |
| rno04657 | IL-17 signaling pathway | 90 | 0.490285 | 1.67499 | 0.011494 | 0.008632 |
| rno04060 | Cytokine-cytokine receptor interaction | 265 | 0.422636 | 1.654011 | 0.000612 | 0.00046 |
| rno03264 | Virion - Flavivirus | 10 | 0.760995 | 1.650246 | 0.069267 | 0.052018 |
| rno05204 | Chemical carcinogenesis - DNA adducts | 56 | 0.524472 | 1.63814 | 0.02068 | 0.01553 |
| rno05133 | Pertussis | 69 | 0.49555 | 1.619459 | 0.028102 | 0.021104 |
| rno03050 | Proteasome | 46 | 0.53667 | 1.619128 | 0.033829 | 0.025405 |
| rno04080 | Neuroactive ligand-receptor interaction | 368 | 0.39894 | 1.611902 | 0.000317 | 0.000238 |
| rno00980 | Metabolism of xenobiotics by cytochrome P450 | 55 | 0.509732 | 1.595163 | 0.046 | 0.034545 |
| rno00020 | Citrate cycle (TCA cycle) | 29 | 0.569916 | 1.576376 | 0.08732 | 0.065575 |
| rno05171 | Coronavirus disease - COVID-19 | 244 | 0.406062 | 1.573967 | 0.002934 | 0.002204 |
| rno01232 | Nucleotide metabolism | 80 | 0.471386 | 1.572364 | 0.03471 | 0.026067 |
| rno05152 | Tuberculosis | 167 | 0.422418 | 1.566226 | 0.009061 | 0.006805 |
| rno00340 | Histidine metabolism | 25 | 0.576769 | 1.552208 | 0.122624 | 0.092088 |
| rno00220 | Arginine biosynthesis | 19 | 0.601754 | 1.542586 | 0.162552 | 0.122074 |
| rno00511 | Other glycan degradation | 18 | 0.615555 | 1.541438 | 0.127954 | 0.096091 |
| rno00983 | Drug metabolism - other enzymes | 73 | 0.463097 | 1.526343 | 0.052366 | 0.039326 |
| rno00480 | Glutathione metabolism | 65 | 0.471174 | 1.523785 | 0.074798 | 0.056172 |
| rno00190 | Oxidative phosphorylation | 118 | 0.421648 | 1.495602 | 0.033783 | 0.025371 |
| rno01230 | Biosynthesis of amino acids | 72 | 0.434306 | 1.426798 | 0.093759 | 0.070411 |
| rno04512 | ECM-receptor interaction | 81 | 0.416437 | 1.39087 | 0.115398 | 0.086662 |
| rno04978 | Mineral absorption | 55 | 0.44393 | 1.389241 | 0.167635 | 0.125891 |
| rno05146 | Amoebiasis | 91 | 0.402014 | 1.374607 | 0.134179 | 0.100766 |
| rno05164 | Influenza A | 159 | 0.366364 | 1.348882 | 0.084306 | 0.063313 |
| rno01200 | Carbon metabolism | 111 | 0.384907 | 1.346989 | 0.122624 | 0.092088 |
| rno01240 | Biosynthesis of cofactors | 137 | 0.372962 | 1.345937 | 0.152052 | 0.114188 |
| rno05020 | Prion disease | 247 | 0.344893 | 1.338694 | 0.052366 | 0.039326 |
| rno04062 | Chemokine signaling pathway | 177 | 0.35489 | 1.327758 | 0.152052 | 0.114188 |
| rno04114 | Oocyte meiosis | 115 | 0.373896 | 1.322755 | 0.171058 | 0.128461 |
| rno04151 | PI3K-Akt signaling pathway | 337 | 0.307652 | 1.234327 | 0.162552 | 0.122074 |
| rno04714 | Thermogenesis | 211 | -0.30084 | -1.22579 | 0.165641 | 0.124393 |
| rno04010 | MAPK signaling pathway | 295 | -0.29351 | -1.23848 | 0.057756 | 0.043373 |
| rno04722 | Neurotrophin signaling pathway | 115 | -0.3454 | -1.28425 | 0.139587 | 0.104827 |
| rno05224 | Breast cancer | 143 | -0.33531 | -1.29307 | 0.122624 | 0.092088 |
| rno04261 | Adrenergic signaling in cardiomyocytes | 147 | -0.33537 | -1.29457 | 0.092833 | 0.069716 |
| rno05207 | Chemical carcinogenesis - receptor activation | 195 | -0.3212 | -1.30073 | 0.071212 | 0.053479 |
| rno05168 | Herpes simplex virus 1 infection | 304 | -0.31263 | -1.31883 | 0.032535 | 0.024433 |
| rno05410 | Hypertrophic cardiomyopathy | 86 | -0.37054 | -1.33254 | 0.139587 | 0.104827 |
| rno04927 | Cortisol synthesis and secretion | 64 | -0.38857 | -1.34354 | 0.15604 | 0.117183 |
| rno04911 | Insulin secretion | 85 | -0.37547 | -1.34902 | 0.120677 | 0.090626 |
| rno03013 | Nucleocytoplasmic transport | 107 | -0.36697 | -1.36152 | 0.08732 | 0.065575 |
| rno04024 | cAMP signaling pathway | 215 | -0.33632 | -1.36847 | 0.051487 | 0.038666 |
| rno04917 | Prolactin signaling pathway | 74 | -0.38867 | -1.37037 | 0.152052 | 0.114188 |
| rno04725 | Cholinergic synapse | 110 | -0.36899 | -1.37953 | 0.08732 | 0.065575 |
| rno04971 | Gastric acid secretion | 73 | -0.39698 | -1.39283 | 0.122624 | 0.092088 |
| rno04912 | GnRH signaling pathway | 87 | -0.38725 | -1.39538 | 0.092977 | 0.069824 |
| rno04213 | Longevity regulating pathway - multiple species | 58 | -0.41496 | -1.4066 | 0.115557 | 0.086781 |
| rno05235 | PD-L1 expression and PD-1 checkpoint pathway in cancer | 87 | -0.39256 | -1.41452 | 0.083587 | 0.062773 |
| rno05414 | Dilated cardiomyopathy | 91 | -0.3909 | -1.41686 | 0.08732 | 0.065575 |
| rno04925 | Aldosterone synthesis and secretion | 92 | -0.39248 | -1.42983 | 0.078287 | 0.058792 |
| rno04152 | AMPK signaling pathway | 119 | -0.38782 | -1.44839 | 0.028102 | 0.021104 |
| rno04921 | Oxytocin signaling pathway | 148 | -0.37659 | -1.45339 | 0.032588 | 0.024473 |
| rno05412 | Arrhythmogenic right ventricular cardiomyopathy | 73 | -0.41428 | -1.45354 | 0.078584 | 0.059015 |
| rno04910 | Insulin signaling pathway | 126 | -0.38601 | -1.45785 | 0.035573 | 0.026715 |
| rno03040 | Spliceosome | 127 | -0.3858 | -1.46183 | 0.025904 | 0.019453 |
| rno04916 | Melanogenesis | 93 | -0.40166 | -1.46626 | 0.037587 | 0.028227 |
| rno04144 | Endocytosis | 250 | -0.35375 | -1.46915 | 0.006732 | 0.005056 |
| rno04658 | Th1 and Th2 cell differentiation | 87 | -0.40912 | -1.47418 | 0.051796 | 0.038898 |
| rno04012 | ErbB signaling pathway | 81 | -0.4135 | -1.4772 | 0.057756 | 0.043373 |
| rno04710 | Circadian rhythm | 32 | -0.49535 | -1.47827 | 0.127954 | 0.096091 |
| rno04961 | Endocrine and other factor-regulated calcium reabsorption | 55 | -0.44106 | -1.47958 | 0.092977 | 0.069824 |
| rno04923 | Regulation of lipolysis in adipocytes | 55 | -0.44161 | -1.48142 | 0.092977 | 0.069824 |
| rno04660 | T cell receptor signaling pathway | 118 | -0.40664 | -1.52012 | 0.013382 | 0.010049 |
| rno00562 | Inositol phosphate metabolism | 71 | -0.43816 | -1.5316 | 0.044522 | 0.033435 |
| rno04015 | Rap1 signaling pathway | 207 | -0.38242 | -1.55707 | 0.004126 | 0.003098 |
| rno05100 | Bacterial invasion of epithelial cells | 74 | -0.44801 | -1.57959 | 0.037587 | 0.028227 |
| rno04919 | Thyroid hormone signaling pathway | 119 | -0.42634 | -1.59226 | 0.006673 | 0.005011 |
| rno04550 | Signaling pathways regulating pluripotency of stem cells | 137 | -0.41898 | -1.6012 | 0.005074 | 0.003811 |
| rno04211 | Longevity regulating pathway | 85 | -0.44828 | -1.61062 | 0.012518 | 0.009401 |
| rno04360 | Axon guidance | 177 | -0.41026 | -1.63742 | 0.001462 | 0.001098 |
| rno04340 | Hedgehog signaling pathway | 52 | -0.4947 | -1.64955 | 0.028102 | 0.021104 |
| rno00310 | Lysine degradation | 61 | -0.48459 | -1.6579 | 0.027847 | 0.020913 |
| rno04330 | Notch signaling pathway | 60 | -0.49946 | -1.69566 | 0.011494 | 0.008632 |
| rno04520 | Adherens junction | 90 | -0.46927 | -1.69924 | 0.005074 | 0.003811 |
| rno03082 | ATP-dependent chromatin remodeling | 107 | -0.46946 | -1.74177 | 0.001181 | 0.000887 |
| rno04392 | Hippo signaling pathway - multiple species | 25 | -0.6236 | -1.77126 | 0.029897 | 0.022452 |
| rno03083 | Polycomb repressive complex | 77 | -0.50464 | -1.79052 | 0.002934 | 0.002204 |
| rno04070 | Phosphatidylinositol signaling system | 90 | -0.50259 | -1.81991 | 0.001107 | 0.000831 |

**Supplementary Table 3 GSEA between the reversible PAH-CHD and the irreversible PAH-CHD**

| ID | Description | setSize | Enrichment Score | NES | p.adjust | qvalue |
| --- | --- | --- | --- | --- | --- | --- |
| rno00140 | Steroid hormone biosynthesis | 66 | 0.602219 | 2.146892 | 3.23E-05 | 1.74E-05 |
| rno05310 | Asthma | 26 | 0.726067 | 2.134527 | 0.000288 | 0.000156 |
| rno05204 | Chemical carcinogenesis - DNA adducts | 56 | 0.615533 | 2.123249 | 9.42E-05 | 5.09E-05 |
| rno00980 | Metabolism of xenobiotics by cytochrome P450 | 55 | 0.59067 | 2.026328 | 0.000158 | 8.53E-05 |
| rno00590 | Arachidonic acid metabolism | 75 | 0.55803 | 2.000111 | 7.06E-05 | 3.82E-05 |
| rno04061 | Viral protein interaction with cytokine and cytokine receptor | 83 | 0.541644 | 1.982443 | 7.40E-05 | 4.00E-05 |
| rno04614 | Renin-angiotensin system | 29 | 0.643828 | 1.948847 | 0.003321 | 0.001795 |
| rno04977 | Vitamin digestion and absorption | 25 | 0.648799 | 1.899824 | 0.004042 | 0.002184 |
| rno00830 | Retinol metabolism | 65 | 0.515192 | 1.85103 | 0.001134 | 0.000613 |
| rno05150 | Staphylococcus aureus infection | 90 | 0.494906 | 1.849625 | 0.000723 | 0.000391 |
| rno00511 | Other glycan degradation | 18 | 0.677204 | 1.819746 | 0.010338 | 0.005587 |
| rno04060 | Cytokine-cytokine receptor interaction | 265 | 0.413932 | 1.80186 | 6.45E-06 | 3.48E-06 |
| rno04610 | Complement and coagulation cascades | 84 | 0.489519 | 1.799117 | 0.000817 | 0.000442 |
| rno00591 | Linoleic acid metabolism | 36 | 0.56519 | 1.787708 | 0.007602 | 0.004108 |
| rno00982 | Drug metabolism - cytochrome P450 | 53 | 0.524807 | 1.787458 | 0.004505 | 0.002435 |
| rno04080 | Neuroactive ligand-receptor interaction | 368 | 0.390544 | 1.769787 | 3.45E-07 | 1.86E-07 |
| rno00380 | Tryptophan metabolism | 50 | 0.522248 | 1.759298 | 0.00488 | 0.002638 |
| rno00790 | Folate biosynthesis | 28 | 0.58187 | 1.751706 | 0.021099 | 0.011403 |
| rno00330 | Arginine and proline metabolism | 51 | 0.510037 | 1.726428 | 0.006853 | 0.003704 |
| rno04975 | Fat digestion and absorption | 43 | 0.521372 | 1.714894 | 0.010849 | 0.005863 |
| rno00340 | Histidine metabolism | 25 | 0.584959 | 1.712886 | 0.020131 | 0.01088 |
| rno03264 | Virion - Flavivirus | 10 | 0.74512 | 1.706492 | 0.03439 | 0.018586 |
| rno05323 | Rheumatoid arthritis | 86 | 0.457322 | 1.69486 | 0.002854 | 0.001543 |
| rno00360 | Phenylalanine metabolism | 17 | 0.622347 | 1.662526 | 0.038491 | 0.020802 |
| rno01240 | Biosynthesis of cofactors | 137 | 0.403461 | 1.638681 | 0.002013 | 0.001088 |
| rno05144 | Malaria | 49 | 0.485145 | 1.623676 | 0.016356 | 0.00884 |
| rno00350 | Tyrosine metabolism | 33 | 0.519912 | 1.618133 | 0.034374 | 0.018578 |
| rno00220 | Arginine biosynthesis | 19 | 0.584537 | 1.614349 | 0.044443 | 0.02402 |
| rno04216 | Ferroptosis | 39 | 0.503163 | 1.608218 | 0.027527 | 0.014877 |
| rno03010 | Ribosome | 153 | 0.382666 | 1.574617 | 0.004258 | 0.002301 |
| rno00190 | Oxidative phosphorylation | 118 | 0.394232 | 1.554554 | 0.006876 | 0.003716 |
| rno04142 | Lysosome | 129 | 0.348597 | 1.392754 | 0.032352 | 0.017485 |
| rno04146 | Peroxisome | 84 | 0.378829 | 1.392303 | 0.056016 | 0.030274 |
| rno04928 | Parathyroid hormone synthesis | 103 | -0.46809 | -1.67782 | 0.003049 | 0.001648 |
| rno04935 | Growth hormone synthesis | 114 | -0.49182 | -1.7843 | 0.000723 | 0.000391 |
| rno04151 | PI3K-Akt signaling pathway | 337 | -0.33326 | -1.35651 | 0.029369 | 0.015872 |
| rno04810 | Regulation of actin cytoskeleton | 221 | -0.35149 | -1.3742 | 0.027527 | 0.014877 |
| rno04152 | AMPK signaling pathway | 119 | -0.39058 | -1.43518 | 0.036309 | 0.019624 |
| rno05225 | Hepatocellular carcinoma | 168 | -0.3778 | -1.44029 | 0.027527 | 0.014877 |
| rno05322 | Systemic lupus erythematosus | 94 | -0.41031 | -1.4478 | 0.055447 | 0.029967 |
| rno04114 | Oocyte meiosis | 115 | -0.40001 | -1.45628 | 0.03201 | 0.0173 |
| rno05226 | Gastric cancer | 141 | -0.39305 | -1.46057 | 0.031074 | 0.016794 |
| rno04115 | p53 signaling pathway | 66 | -0.43668 | -1.46247 | 0.044443 | 0.02402 |
| rno05146 | Amoebiasis | 91 | -0.41635 | -1.47148 | 0.044443 | 0.02402 |
| rno04540 | Gap junction | 85 | -0.42087 | -1.47225 | 0.047334 | 0.025582 |
| rno05410 | Hypertrophic cardiomyopathy | 86 | -0.42362 | -1.48078 | 0.044443 | 0.02402 |
| rno05207 | Chemical carcinogenesis - receptor activation | 195 | -0.38449 | -1.48233 | 0.018512 | 0.010005 |
| rno05132 | Salmonella infection | 239 | -0.37575 | -1.48424 | 0.007669 | 0.004145 |
| rno05418 | Fluid shear stress and atherosclerosis | 139 | -0.40096 | -1.48634 | 0.017369 | 0.009387 |
| rno05412 | Arrhythmogenic right ventricular cardiomyopathy | 73 | -0.43406 | -1.48836 | 0.040012 | 0.021625 |
| rno04931 | Insulin resistance | 104 | -0.41644 | -1.49833 | 0.030063 | 0.016248 |
| rno04720 | Long-term potentiation | 63 | -0.45172 | -1.50128 | 0.055447 | 0.029967 |
| rno04925 | Aldosterone synthesis and secretion | 92 | -0.42864 | -1.50868 | 0.038491 | 0.020802 |
| rno04936 | Alcoholic liver disease | 127 | -0.4104 | -1.5116 | 0.01953 | 0.010555 |
| rno04916 | Melanogenesis | 93 | -0.43137 | -1.5183 | 0.03201 | 0.0173 |
| rno04010 | MAPK signaling pathway | 295 | -0.37839 | -1.5197 | 0.003248 | 0.001755 |
| rno04722 | Neurotrophin signaling pathway | 115 | -0.41789 | -1.52139 | 0.017369 | 0.009387 |
| rno04611 | Platelet activation | 121 | -0.4149 | -1.52285 | 0.018512 | 0.010005 |
| rno04917 | Prolactin signaling pathway | 74 | -0.44366 | -1.52681 | 0.040942 | 0.022128 |
| rno04918 | Thyroid hormone synthesis | 73 | -0.44778 | -1.5354 | 0.028488 | 0.015396 |
| rno05223 | Non-small cell lung cancer | 70 | -0.45416 | -1.54218 | 0.045158 | 0.024406 |
| rno05135 | Yersinia infection | 131 | -0.41788 | -1.54393 | 0.013073 | 0.007065 |
| rno05214 | Glioma | 70 | -0.45481 | -1.54441 | 0.045158 | 0.024406 |
| rno04725 | Cholinergic synapse | 110 | -0.42716 | -1.5479 | 0.012685 | 0.006856 |
| rno04550 | Signaling pathways regulating pluripotency of stem cells | 137 | -0.42197 | -1.55972 | 0.007488 | 0.004047 |
| rno04921 | Oxytocin signaling pathway | 148 | -0.41682 | -1.56061 | 0.005209 | 0.002815 |
| rno05218 | Melanoma | 71 | -0.45904 | -1.56494 | 0.034687 | 0.018747 |
| rno00562 | Inositol phosphate metabolism | 71 | -0.46099 | -1.5716 | 0.033484 | 0.018097 |
| rno05205 | Proteoglycans in cancer | 197 | -0.40614 | -1.57192 | 0.003866 | 0.002089 |
| rno05224 | Breast cancer | 143 | -0.42254 | -1.57304 | 0.004191 | 0.002265 |
| rno04934 | Cushing syndrome | 151 | -0.41929 | -1.57469 | 0.004773 | 0.00258 |
| rno00310 | Lysine degradation | 61 | -0.47943 | -1.58031 | 0.02917 | 0.015765 |
| rno04961 | Endocrine and other factor-regulated calcium reabsorption | 55 | -0.49023 | -1.58576 | 0.026441 | 0.01429 |
| rno04510 | Focal adhesion | 193 | -0.41235 | -1.5891 | 0.003321 | 0.001795 |
| rno04217 | Necroptosis | 137 | -0.43222 | -1.59757 | 0.004722 | 0.002552 |
| rno05142 | Chagas disease | 100 | -0.44837 | -1.59955 | 0.013073 | 0.007065 |
| rno04066 | HIF-1 signaling pathway | 107 | -0.44376 | -1.60365 | 0.010338 | 0.005587 |
| rno04933 | AGE-RAGE signaling pathway in diabetic complications | 99 | -0.45242 | -1.6119 | 0.010338 | 0.005587 |
| rno05168 | Herpes simplex virus 1 infection | 304 | -0.40044 | -1.61251 | 0.000395 | 0.000214 |
| rno05170 | Human immunodeficiency virus 1 infection | 204 | -0.41715 | -1.62572 | 0.001544 | 0.000835 |
| rno04613 | Neutrophil extracellular trap formation | 150 | -0.43522 | -1.63074 | 0.002522 | 0.001363 |
| rno04340 | Hedgehog signaling pathway | 52 | -0.50952 | -1.63081 | 0.028488 | 0.015396 |
| rno04213 | Longevity regulating pathway - multiple species | 58 | -0.50083 | -1.63432 | 0.017369 | 0.009387 |
| rno04668 | TNF signaling pathway | 113 | -0.45117 | -1.63585 | 0.006782 | 0.003666 |
| rno04814 | Motor proteins | 174 | -0.42603 | -1.63606 | 0.001622 | 0.000877 |
| rno04915 | Estrogen signaling pathway | 127 | -0.44517 | -1.63966 | 0.003817 | 0.002063 |
| rno05167 | Kaposi sarcoma-associated herpesvirus infection | 190 | -0.42981 | -1.6582 | 0.001244 | 0.000672 |
| rno04360 | Axon guidance | 177 | -0.43321 | -1.66614 | 0.001349 | 0.000729 |
| rno04015 | Rap1 signaling pathway | 207 | -0.42859 | -1.6715 | 0.000519 | 0.000281 |
| rno03440 | Homologous recombination | 40 | -0.5479 | -1.67348 | 0.018512 | 0.010005 |
| rno04926 | Relaxin signaling pathway | 124 | -0.4575 | -1.67518 | 0.002013 | 0.001088 |
| rno05034 | Alcoholism | 148 | -0.44912 | -1.68154 | 0.001244 | 0.000672 |
| rno05165 | Human papillomavirus infection | 325 | -0.41647 | -1.68414 | 4.05E-05 | 2.19E-05 |
| rno05169 | Epstein-Barr virus infection | 205 | -0.43326 | -1.68808 | 0.00047 | 0.000254 |
| rno05166 | Human T-cell leukemia virus 1 infection | 227 | -0.4305 | -1.69201 | 0.000434 | 0.000235 |
| rno03083 | Polycomb repressive complex | 77 | -0.4952 | -1.7066 | 0.003562 | 0.001925 |
| rno01521 | EGFR tyrosine kinase inhibitor resistance | 78 | -0.49371 | -1.70887 | 0.006204 | 0.003353 |
| rno04912 | GnRH signaling pathway | 87 | -0.49111 | -1.7205 | 0.003892 | 0.002104 |
| rno04910 | Insulin signaling pathway | 126 | -0.46825 | -1.72398 | 0.001349 | 0.000729 |
| rno04914 | Progesterone-mediated oocyte maturation | 90 | -0.48913 | -1.72571 | 0.004191 | 0.002265 |
| rno04068 | FoxO signaling pathway | 123 | -0.47415 | -1.73321 | 0.001244 | 0.000672 |
| rno04919 | Thyroid hormone signaling pathway | 119 | -0.47645 | -1.75071 | 0.001134 | 0.000613 |
| rno05220 | Chronic myeloid leukemia | 75 | -0.51219 | -1.76961 | 0.004042 | 0.002184 |
| rno04218 | Cellular senescence | 161 | -0.46927 | -1.77004 | 0.000158 | 8.53E-05 |
| rno05210 | Colorectal cancer | 84 | -0.50618 | -1.77029 | 0.001939 | 0.001048 |
| rno05211 | Renal cell carcinoma | 66 | -0.52972 | -1.77408 | 0.002522 | 0.001363 |
| rno04392 | Hippo signaling pathway - multiple species | 25 | -0.64078 | -1.77634 | 0.010338 | 0.005587 |
| rno05213 | Endometrial cancer | 56 | -0.54922 | -1.77914 | 0.003279 | 0.001772 |
| rno03040 | Spliceosome | 127 | -0.48513 | -1.78683 | 0.000519 | 0.000281 |
| rno01522 | Endocrine resistance | 92 | -0.50851 | -1.78981 | 0.001888 | 0.001021 |
| rno05203 | Viral carcinogenesis | 194 | -0.46806 | -1.80463 | 5.76E-05 | 3.11E-05 |
| rno04070 | Phosphatidylinositol signaling system | 90 | -0.51272 | -1.80894 | 0.001349 | 0.000729 |
| rno05212 | Pancreatic cancer | 74 | -0.52863 | -1.81921 | 0.002222 | 0.001201 |
| rno04144 | Endocytosis | 250 | -0.45928 | -1.82258 | 2.08E-05 | 1.12E-05 |
| rno04520 | Adherens junction | 90 | -0.52144 | -1.83969 | 0.00085 | 0.000459 |
| rno04211 | Longevity regulating pathway | 85 | -0.53332 | -1.86561 | 0.000817 | 0.000442 |
| rno05161 | Hepatitis B | 148 | -0.49924 | -1.86918 | 5.76E-05 | 3.11E-05 |
| rno03460 | Fanconi anemia pathway | 47 | -0.5958 | -1.87037 | 0.001349 | 0.000729 |
| rno05163 | Human cytomegalovirus infection | 224 | -0.4775 | -1.87207 | 6.45E-06 | 3.48E-06 |
| rno05206 | MicroRNAs in cancer | 155 | -0.50689 | -1.9077 | 4.05E-05 | 2.19E-05 |
| rno05222 | Small cell lung cancer | 87 | -0.54554 | -1.91119 | 0.000395 | 0.000214 |
| rno05100 | Bacterial invasion of epithelial cells | 74 | -0.56026 | -1.92805 | 0.000519 | 0.000281 |
| rno03013 | Nucleocytoplasmic transport | 107 | -0.53584 | -1.93643 | 0.000125 | 6.77E-05 |
| rno05215 | Prostate cancer | 95 | -0.55193 | -1.94648 | 0.000177 | 9.56E-05 |
| rno03082 | ATP-dependent chromatin remodeling | 107 | -0.54374 | -1.96497 | 7.06E-05 | 3.82E-05 |
| rno04012 | ErbB signaling pathway | 81 | -0.56747 | -1.97455 | 0.000158 | 8.53E-05 |
| rno04110 | Cell cycle | 151 | -0.57172 | -2.14715 | 8.28E-08 | 4.48E-08 |
